# Supplementary material for: Boosting the stability of BiVO4 photoanodes: in situ cocatalyst passivation and immobilization by functional fluorine anions
Source: Royal Society of Chemistry journal article supplement (doi:10.1039/d0ta12338b), 2021-01-01
Supplement: d0ta12338b1.pdf [file d0ta12338b1.pdf]

## Supporting Information

### **Boosting High Stability on BiVO<sub>4</sub> Photoanodes: In-situ Cocatalyst Passivation and Immobilization by Functional Fluorine Anions**

Rui-Ting Gao,<sup>[a]</sup> Lijun Wu,<sup>[a]</sup> Shujie Liu,<sup>[a]</sup> Kan Hu,<sup>[a]</sup> Xianhu Liu,<sup>[b]</sup> Jun Zhang,<sup>\*[a]</sup> and Lei Wang<sup>\*[a]</sup>

<sup>[a]</sup> School of Chemistry and Chemical Engineering & Inner Mongolia Engineering and Technology Research Center for Catalytic Conversion and Utilization of Carbon Resource Molecules, Inner Mongolia University, 235 West University Street, Hohhot 010021, China

<sup>[b]</sup> Key Laboratory of Materials Processing and Mold, Ministry of Education, Zhengzhou University, Zhengzhou 450002, China

\* Corresponding authors: [cejzhang@imu.edu.cn](mailto:cejzhang@imu.edu.cn) (J.Z.); [wanglei@imu.edu.cn](mailto:wanglei@imu.edu.cn) (L.W.)

## Methods

### 1. Material preparation

BiOI was prepared according to previous reported method.<sup>1</sup> 100 ml KI (0.4 M) was added into 0.04 M Bi(NO<sub>3</sub>)<sub>3</sub>·5H<sub>2</sub>O, in which HNO<sub>3</sub> was added to adjust the pH value of 1.7. This solution was mixed with a 40 ml ethanol solution containing 0.23 M p-benzoquinone. The anode deposition was performed at -0.1 V<sub>Ag/AgCl</sub> for 300 s to form BiOI. The dimethyl sulfoxide (DMSO) solution containing 0.2 M vanadyl acetylacetonate (VO(acac)<sub>2</sub>) was dropped on the BiOI for annealing at 450 °C for 2 h. The annealed BiVO<sub>4</sub> was slowly stirred in 1 M NaOH for 30 minutes to remove excess V<sub>2</sub>O<sub>5</sub>. The as-prepared BiVO<sub>4</sub> is noted as BVO in the manuscript.

For the preparation of Co(CO<sub>3</sub>)<sub>x</sub>OH<sub>y</sub>/BiVO<sub>4</sub>, the precursor solution containing 6 mM Co(NO<sub>3</sub>)<sub>2</sub>·6H<sub>2</sub>O and 30 mM urea was thoroughly stirred. The BiVO<sub>4</sub> was put into the stainless steel reactor (50 mL) with a 30 mL precursor solution for reaction at 120 °C for 6 h. The preparation of F:Co(CO<sub>3</sub>)<sub>x</sub>OH<sub>y</sub>/BiVO<sub>4</sub> is similar to that of Co(CO<sub>3</sub>)<sub>x</sub>OH<sub>y</sub>/BiVO<sub>4</sub>, only 4.7 mM ammonium fluoride (NH<sub>4</sub>F) was added in precursor containing Co(NO<sub>3</sub>)<sub>2</sub>·6H<sub>2</sub>O and urea.

For the preparation of Co<sub>3</sub>O<sub>4</sub> and F:Co<sub>3</sub>O<sub>4</sub>. The precursor was prepared with 1.2 mM Co(NO<sub>3</sub>)<sub>2</sub>·6H<sub>2</sub>O, 8.4 mM urea, and 0.4 mM SnCl<sub>4</sub> in 20 mL deionized water. After being fully stirred, the BiVO<sub>4</sub> and precursor were put into the reactor for reaction at 120 °C for various times (10, 20, 30, and 40 min). Then, the sample was heating at 400 °C for 1 h. For the F:Co<sub>3</sub>O<sub>4</sub>, the sample and 0.05 g NH<sub>4</sub>F were placed in a tube furnace for annealing at 400 °C for 1 h under Ar atmosphere. The F-treated BiVO<sub>4</sub> was soaked up-to-down in a 10 mL solution containing NH<sub>4</sub>F (1 M) for 3 h.

### 2. Photoelectrochemical measurements

Photoelectrochemical measurements were measured in a standard three-electrode system with an electrochemical analyzer (CHI760D, CH Instruments, Inc.). The light source was simulated sunlight AM 1.5G (100 mW cm<sup>-2</sup>, PLS-FX300HU, Beijing Perfectlight Technology Co., Ltd.). All samples were illuminated from the back sides. 1 M KBi solution with pH of 9.5 was used as the electrolyte. Photocurrent vs voltage (*J-V*) curves were recorded by scanning the potential from -0.7 to 0.6 V<sub>Ag/AgCl</sub> with a rate of 10 mV s<sup>-1</sup> under AM 1.5 G back illumination. Electrochemical impedance spectroscopy (EIS) was performed at 0.6 V<sub>RHE</sub> with a small AC amplitude of 10 mV in the frequency range of 10<sup>-2</sup>-10<sup>5</sup> Hz under back illumination. Mott-Schottky spectra were obtained in the voltage window of 0~0.6

$V_{RHE}$  in the dark (increment: 10 mV, frequency: 1 kHz).

During the  $J-t$  measurement, various amounts of F anions (1 M) were added into KBi electrolyte (15 mL) without changing pH value. For comparison, 0.5  $\mu\text{L}$   $\text{Co}^{2+}$  (0.1 M  $\text{Co}(\text{NO}_3)_2 \cdot 6\text{H}_2\text{O}$ ), 0.5  $\mu\text{L}$   $\text{Fe}^{3+}$  (0.1 M  $\text{Fe}(\text{NO}_3)_3 \cdot 9\text{H}_2\text{O}$ ), and 0.5  $\mu\text{L}$   $\text{Ni}^{2+}$  (0.1 M  $\text{Ni}(\text{NO}_3)_2 \cdot 6\text{H}_2\text{O}$ ) ions were added into KBi (15 mL). During the activation of  $\text{Co}_3\text{O}_4$ , 6  $\mu\text{L}$   $\text{NH}_4\text{F}$  (1 M) was added into 15 ml KBi electrolyte. For the long-term stability measurement of  $\text{Co}(\text{CO}_3)_x\text{OH}_y/\text{BiVO}_4$  in KBi with the additive F, 0.5  $\mu\text{L}$   $\text{NH}_4\text{F}$  (1 M) was added into the fresh KBi and measured at 0.6  $V_{RHE}$  under AM 1.5G back illumination. Incident light-electron conversion efficiency (IPCE) was measured at 1.23  $V_{RHE}$  in 1 M KBi using Xe lamp (CEL-SLF-Vertex, CEAULIGHT Co., Ltd.). Use the following formula to calculate IPCE.

$$IPCE(\%) = \frac{J \times 1240}{\lambda \times P_{light}} \times 100\% \quad (1)$$

where  $J$  presents the photocurrent density ( $\text{mA cm}^{-2}$ ) obtained from the electrochemical workstation.  $\lambda$  and  $P_{light}$  are the incident light wavelength (nm) and the power density obtained at a specific wavelength ( $\text{mW cm}^{-2}$ ), respectively. Applied bias photon-to-current efficiency (ABPE) can be calculated using the following equation:

$$ABPE(\%) = \frac{J \times (1.23 - V_b)}{P_{total}} \quad (2)$$

$J$  is the photocurrent density ( $\text{mA cm}^{-2}$ ) obtained from the electrochemical workstation.  $V_b$  refers to the applied bias versus RHE (V), and  $P_{total}$  is the total light intensity of AM 1.5 G ( $100 \text{ mW cm}^{-2}$ ). The charge separation efficiency ( $\eta_{sep}$ , the yield of photo-generated holes reaching the semiconductor/electrolyte interface) and the surface charge transfer efficiency ( $\eta_{trans}$ , the yield of holes participating in the water oxidation reaction after reaching the electrode/electrolyte interface) can be calculated using the following formula .

$$\eta_{surface} = \frac{J_{H_2O}}{J_{Na_2SO_3}} \quad (3)$$

$$\eta_{abs \times sep} = \frac{J_{Na_2SO_3}}{7.5} \quad (4)$$

While  $J_{H_2O}$  and  $J_{Na_2SO_3}$  are the photocurrent densities obtained in 1 M KBi without and with 0.2 M  $\text{Na}_2\text{SO}_3$ , 7.5  $\text{mA/cm}^2$  is the theoretical limit of  $\text{BiVO}_4$  under AM 1.5 G illumination.

Photocurrent spectra were collected at 1.23  $V_{RHE}$  in KBi in the range of 350-550 nm using amonichromatic light by a Xe-lamp (CEL-SLF-Vertex). The gas production was collected with a (Shimadzu, GC-2014C).

### 3. *Materials characterization*

The crystalline structure was identified by X-ray diffraction analysis (XRD, Rigaku RINT-2000) using Cu K $\alpha$  radiation at 40 kV and 40 mA. The elemental composition was determined by X-ray photoelectron spectroscopy (XPS, ESCALAB 250xi, Thermo Fisher Scientific). The elemental contents in electrolyte was analyzed using inductively coupled plasma optical emission spectroscopy (ICP-OES-720ES, Agilent, USA). Scanning electron microscopy (SEM) and transmission electron microscopy (TEM) were carried out using FE-SEM-Supra 55 (Zeiss, Germany) and JEM-2100F (JEOL, Japan) systems. UV-visible diffuse reflectance spectra were performed on a UV-2600 (Shimadzu) spectrometer by using BaSO<sub>4</sub> as the reference.

### Reference

1. T. W. Kim, K.-S. Choi. *Science* 2014, 343, 990-994.

**Table S1.** Comparison of PEC activities and stability for cocatalysts decorated on BiVO<sub>4</sub> photoanodes.

| Photoanode                                                           | $J$ (mA cm <sup>-2</sup><br>@1.23 V <sub>RHE</sub> ) | Stability                                                           | Electrolyte                                    | Reference                                    |
|----------------------------------------------------------------------|------------------------------------------------------|---------------------------------------------------------------------|------------------------------------------------|----------------------------------------------|
| Co(CO <sub>3</sub> ) <sub>x</sub> OH <sub>y</sub> /BiVO <sub>4</sub> | <b>5.1</b><br><b>5.1</b>                             | <b>10 h@0.6 V<sub>RHE</sub></b><br><b>100 h@0.6 V<sub>RHE</sub></b> | <b>1 M KBi</b><br><b>1 M KBi+F<sup>-</sup></b> | <b><i>This work.</i></b>                     |
| NiOOH/FeOOH/BiVO <sub>4</sub>                                        | 4.8                                                  | 500 h@0.6 V <sub>RHE</sub>                                          | 1 M KBi+V <sub>2</sub> O <sub>5</sub>          | <i>Nature Energy</i> 2018, 3, 53.            |
| Mo:BiVO <sub>4</sub> /Ni/Sn                                          | 2.6<br>@0.6 V <sub>RHE</sub>                         | 1100 h@0.6 V <sub>RHE</sub>                                         | 1 M KBi+Fe <sup>2+</sup>                       | <i>Nature Energy</i> 2016, 2, 16191.         |
| Etched-NiOOH/BiVO <sub>4</sub>                                       | 5.43                                                 | 200 h@0.8 V <sub>RHE</sub>                                          | 1 M KBi+Fe <sup>2+</sup>                       | <i>Angew. Chem. Int. Ed.</i> 2020, 59, 6213. |
| NiFeO <sub>x</sub> /BiVO <sub>4</sub>                                | 5.54                                                 | 100 h@1.23 V <sub>RHE</sub>                                         | 1 M KBi                                        | <i>Adv. Mater.</i> 2020, 2001385.            |
| NiOOH/NiOOH/2-BiVO <sub>4</sub> dual electrode                       | 5.87                                                 | 100 h@1.23 V <sub>RHE</sub>                                         | 1 M KBi                                        | <i>Adv. Mater.</i> 2018, 30, 1800486.        |
| NiOOH/black P/BiVO <sub>4</sub>                                      | 4.48                                                 | 60 h@1.23 V <sub>RHE</sub>                                          | 0.5 M KPi                                      | <i>Nature Commun.</i> 2019, 10, 2001.        |
| NiOOH/FeOOH/BiVO <sub>4</sub>                                        | 4.2                                                  | 48 h@0.6 V <sub>RHE</sub>                                           | 0.5 M KPi                                      | <i>Science</i> 2014, 343, 990.               |
| NiFeY LDH/BiVO <sub>4</sub>                                          | 5.2                                                  | 24 h@0.8 V <sub>RHE</sub>                                           | 1 M KBi                                        | <i>ACS Catal.</i> 2020, 10, 10570.           |
| Fh/BiVO <sub>4</sub>                                                 | 4.78                                                 | 50 h@0.61 V <sub>RHE</sub>                                          | 0.4 M KBi                                      | <i>ACS Catal.</i> 2017, 7, 1868.             |
| NiOOH/FeOOH/TiO <sub>2-x</sub> /BiVO <sub>4</sub>                    | 6.12                                                 | 100 h@1.23 V <sub>RHE</sub>                                         | 0.5 M KPi                                      | <i>Adv. Energy Mater.</i> 2019, 9, 1901287.  |
| Molecular Co <sub>4</sub> O <sub>4</sub> /BiVO <sub>4</sub>          | 5.0                                                  | 140 s@0.7 V <sub>RHE</sub>                                          | 0.5 KBi                                        | <i>Angew. Chem. Int. Ed.</i> 2017, 56, 6911. |

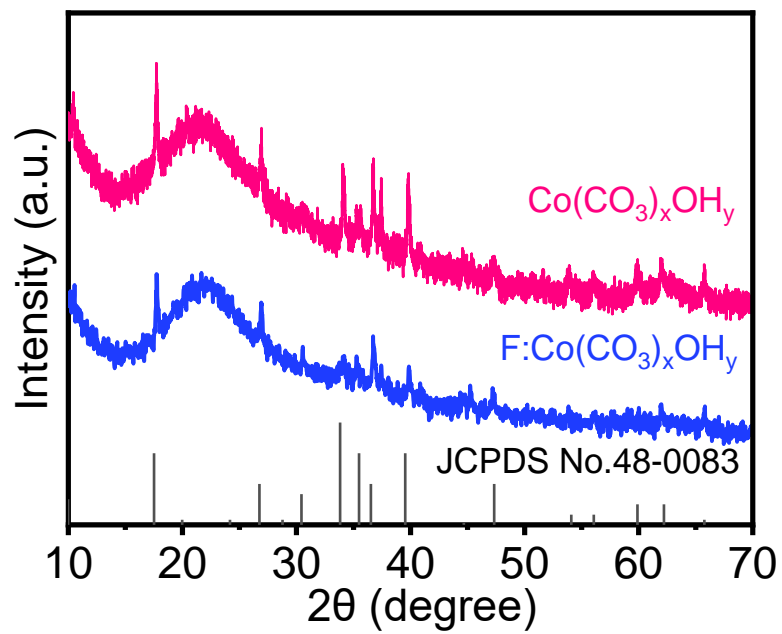

**Figure S1.** XRD patterns of  $\text{Co}(\text{CO}_3)_x\text{OH}_y$  and  $\text{F}:\text{Co}(\text{CO}_3)_x\text{OH}_y$ . The powders of samples were collected from the bottom of autoclaves.

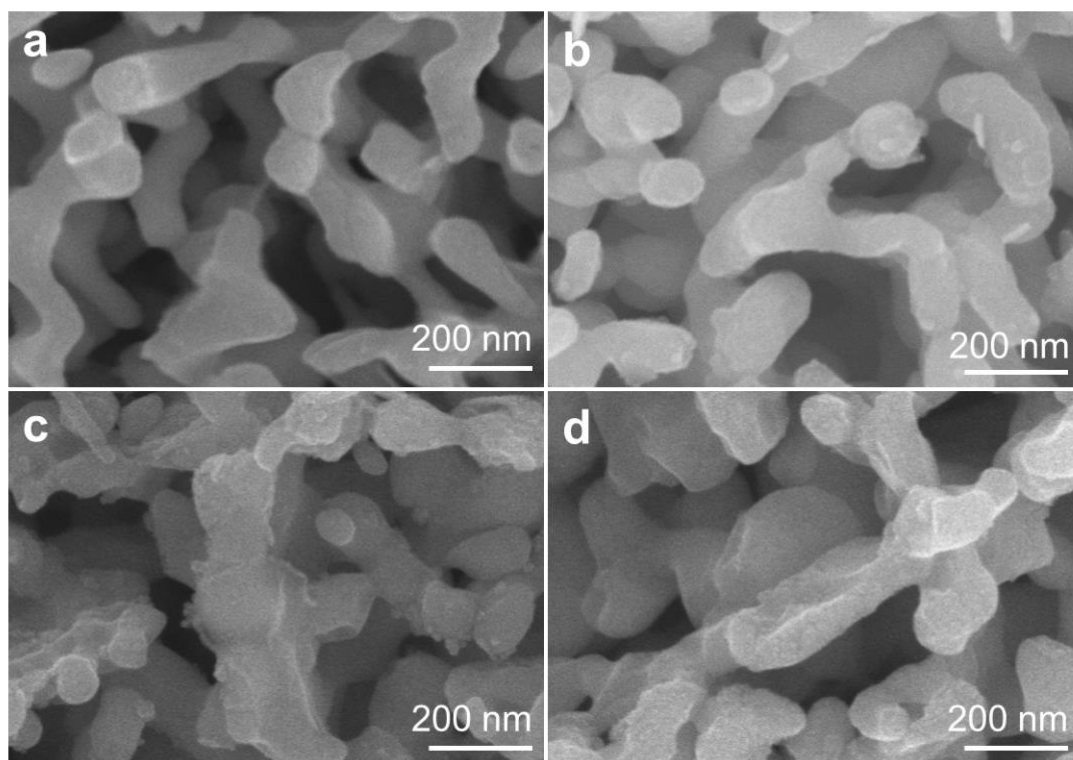

**Figure S2.** (a-d) SEM images of (a,c)  $\text{Co}(\text{CO}_3)_x\text{OH}_y/\text{BVO}$  and (b,d)  $\text{F}:\text{Co}(\text{CO}_3)_x\text{OH}_y/\text{BVO}$  (a,b) before and (c,d) after  $J-t$  measurement.

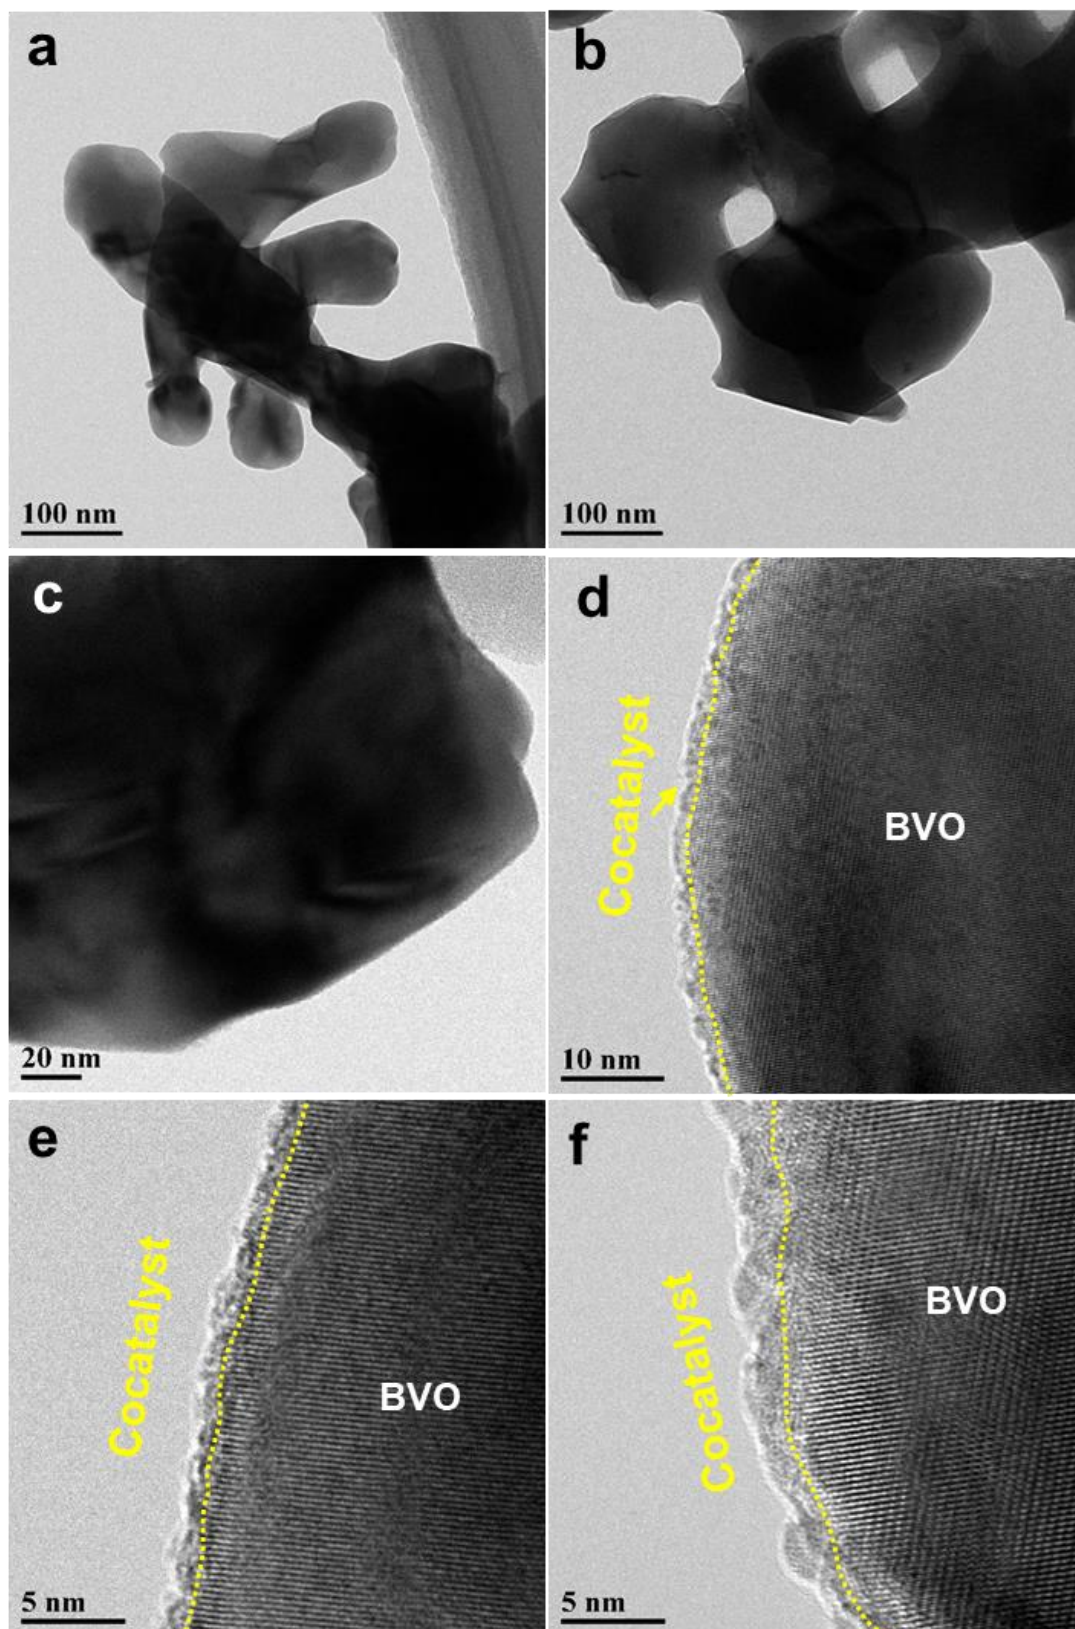

**Figure S3.** (a-d) TEM images of  $\text{Co}(\text{CO}_3)_x\text{OH}_y/\text{BVO}$ .



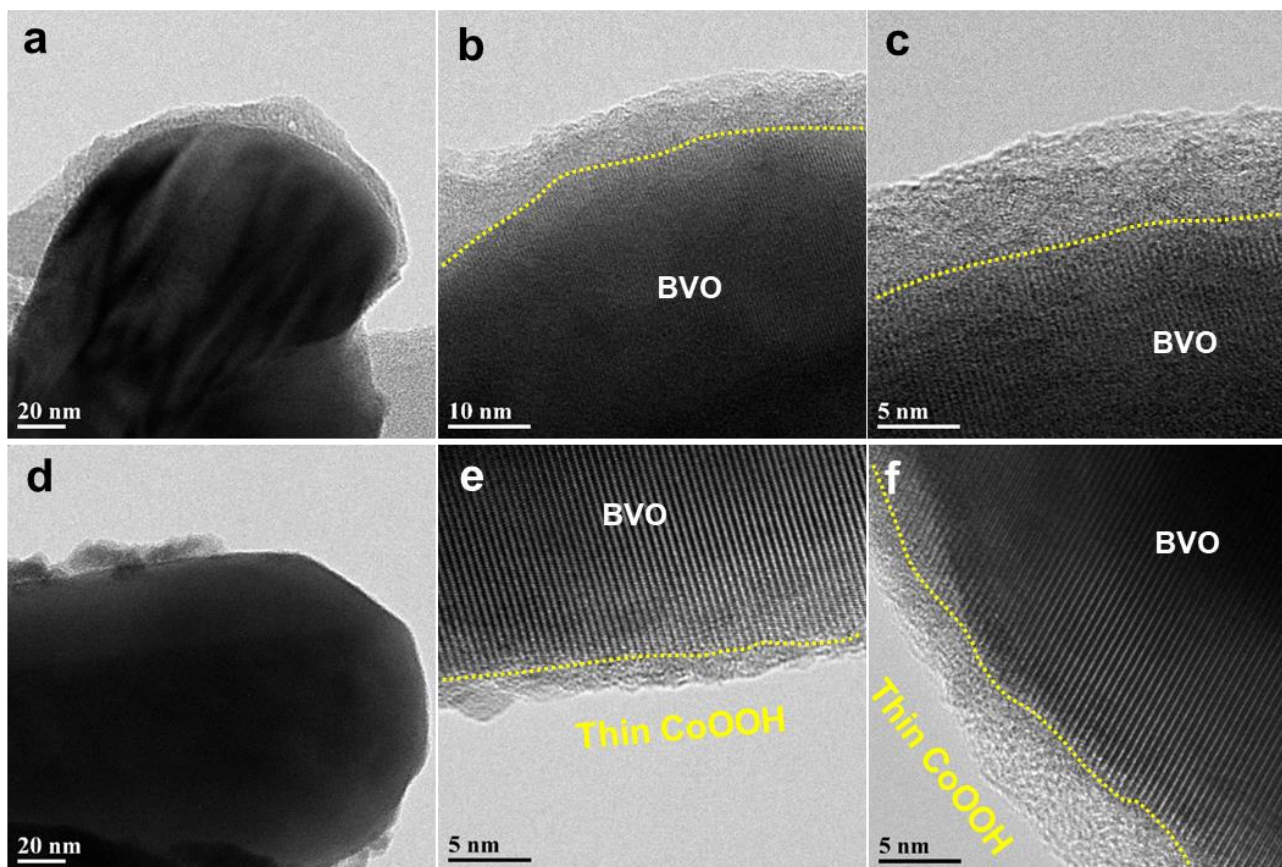

**Figure S4.** (a-f) TEM images of F:Co(CO<sub>3</sub>)<sub>x</sub>OH<sub>y</sub>/BVO (a-c) before and (d-f) after *J-t* measurement.

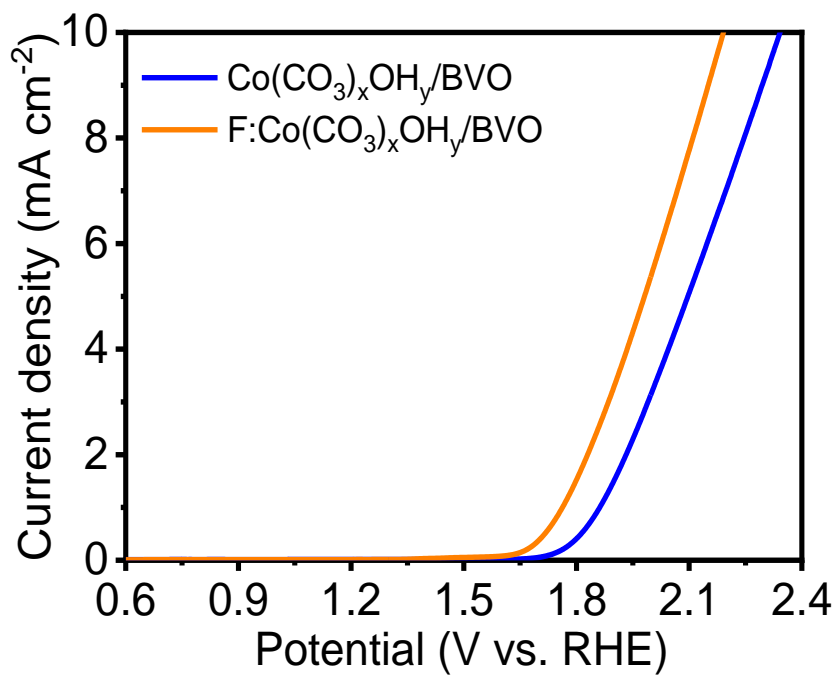

**Figure S5.** *J-V* curves of Co(CO<sub>3</sub>)<sub>x</sub>OH<sub>y</sub>/BVO and F:Co(CO<sub>3</sub>)<sub>x</sub>OH<sub>y</sub>/BVO in KBi under dark.

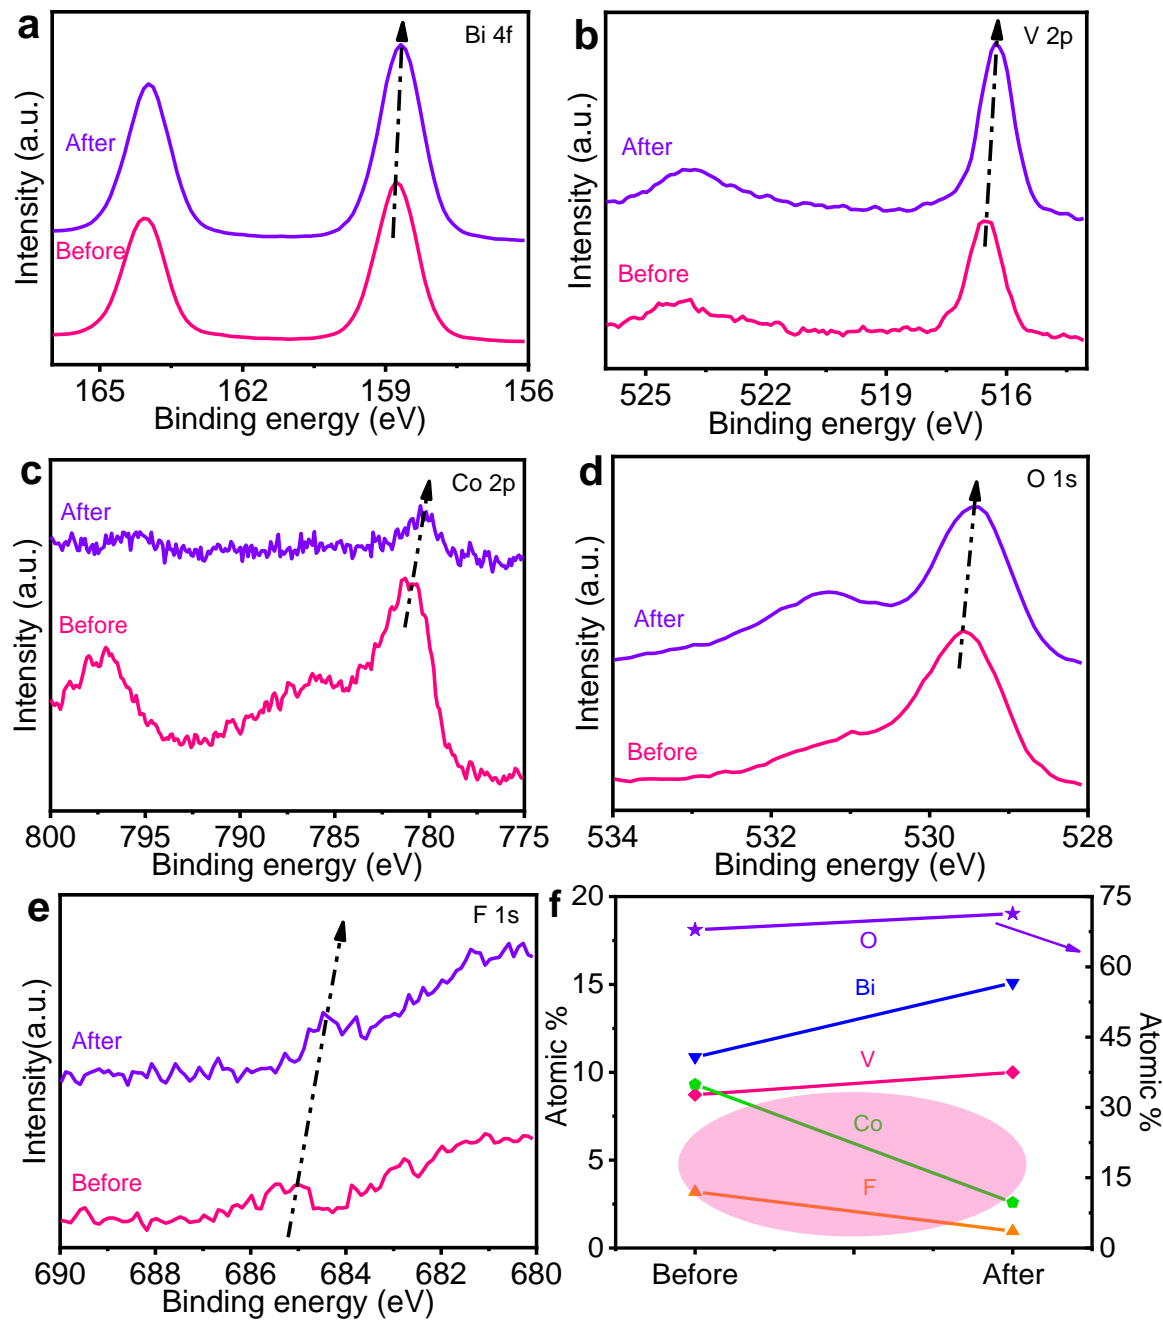

**Figure S6.** (a-d) XPS (a) Bi 4f, (b) V 2p, (c) Co 2p, (d) O 1s, and (e) F 1s spectra of F:Co(CO<sub>3</sub>)<sub>x</sub>OH<sub>y</sub>/BVO before and after *J-t* measurement of 20 h in KBi under AM 1.5G illumination; (f) element contents of corresponding electrodes.

The F 1s shows a main peak at 685 eV, and the peak intensity of F 1s is decreased after *J-t* measurement, accompanying with a shift towards the lower B.E. (**Figure S6e**).

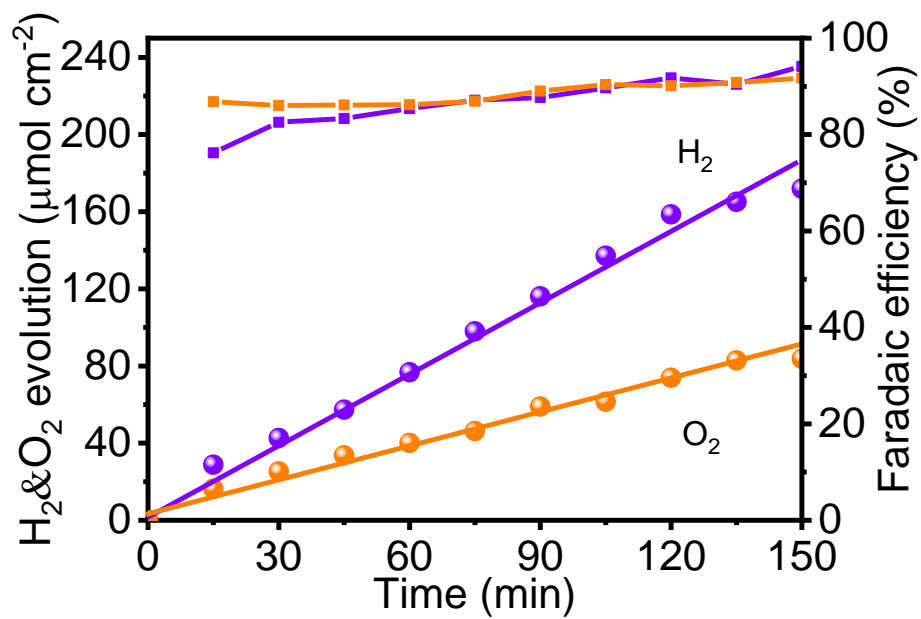

**Figure S7.** Oxygen and hydrogen evolution produced by gas chromatography and faradaic efficiency of  $\text{Co}(\text{CO}_3)_x\text{OH}_y/\text{BVO}$  at  $1.23 \text{ V}_{\text{RHE}}$  for 5 h under AM 1.5G illumination in 1 M  $\text{KBi}+\text{F}$ .

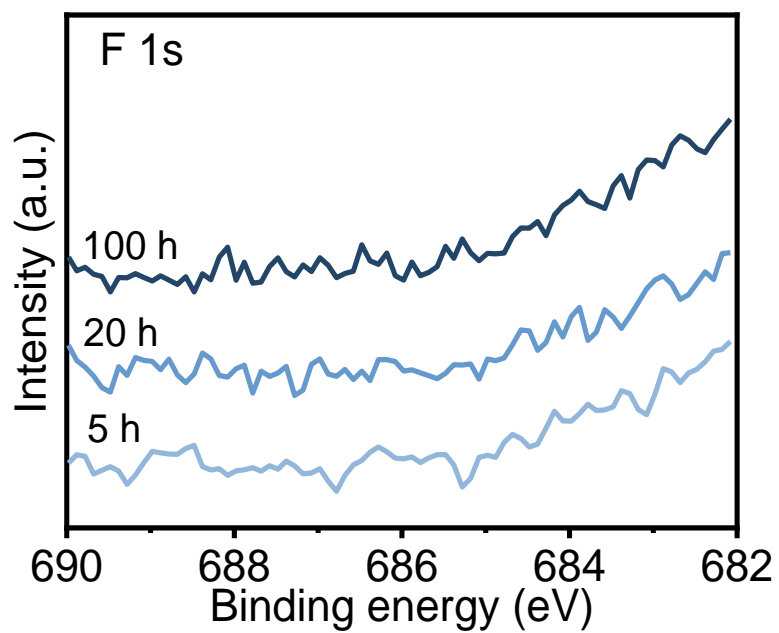

**Figure S8.** F 1s XPS spectra of  $\text{Co}(\text{CO}_3)_x\text{OH}_y/\text{BVO}$  in  $\text{KBi}+\text{F}$  at  $0.6 \text{ V}_{\text{RHE}}$  for various times.

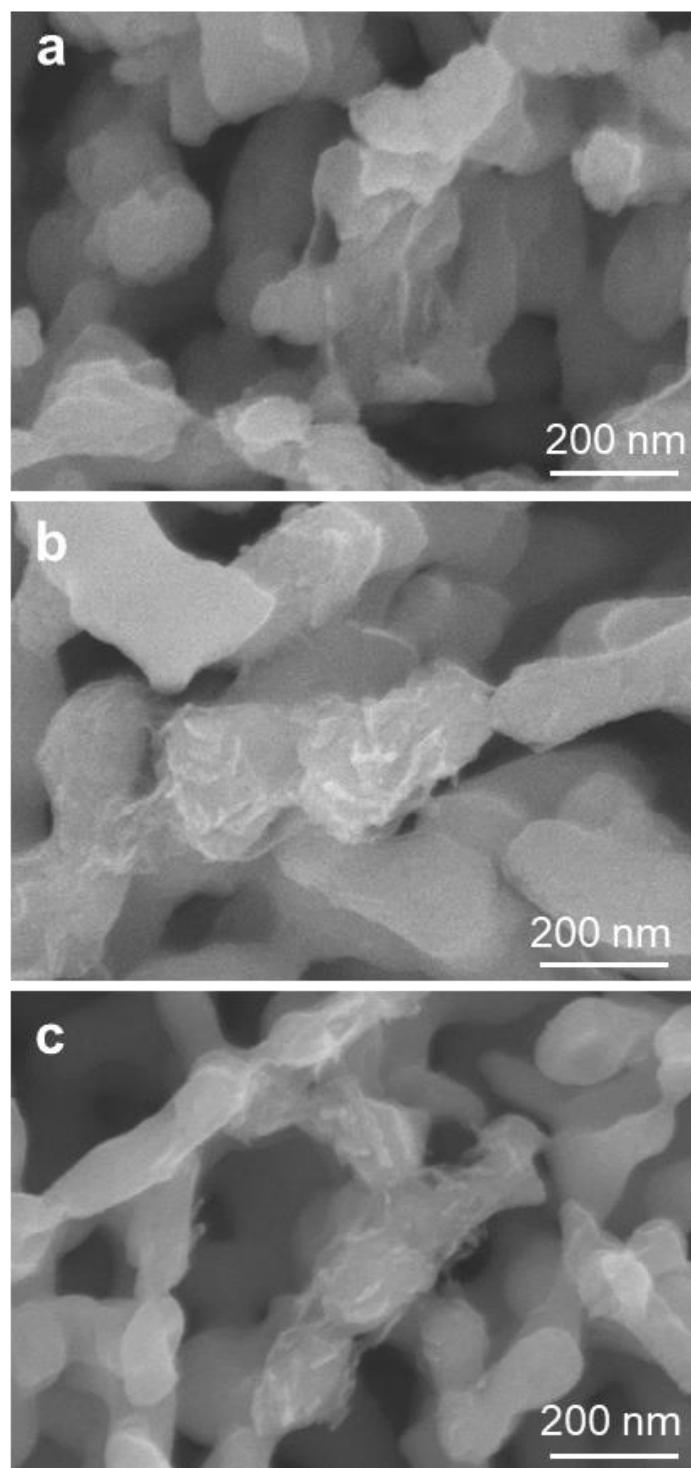

**Figure S9.** (a-c) SEM images of  $\text{Co}(\text{CO}_3)_x\text{OH}_y/\text{BVO}$  in (a)  $\text{KBi}+\text{Co}$ , (b)  $\text{KBi}+\text{Fe}$ , and (c)  $\text{KBi}+\text{Ni}$  electrolytes after  $J-t$  measurements for 1-3 h.

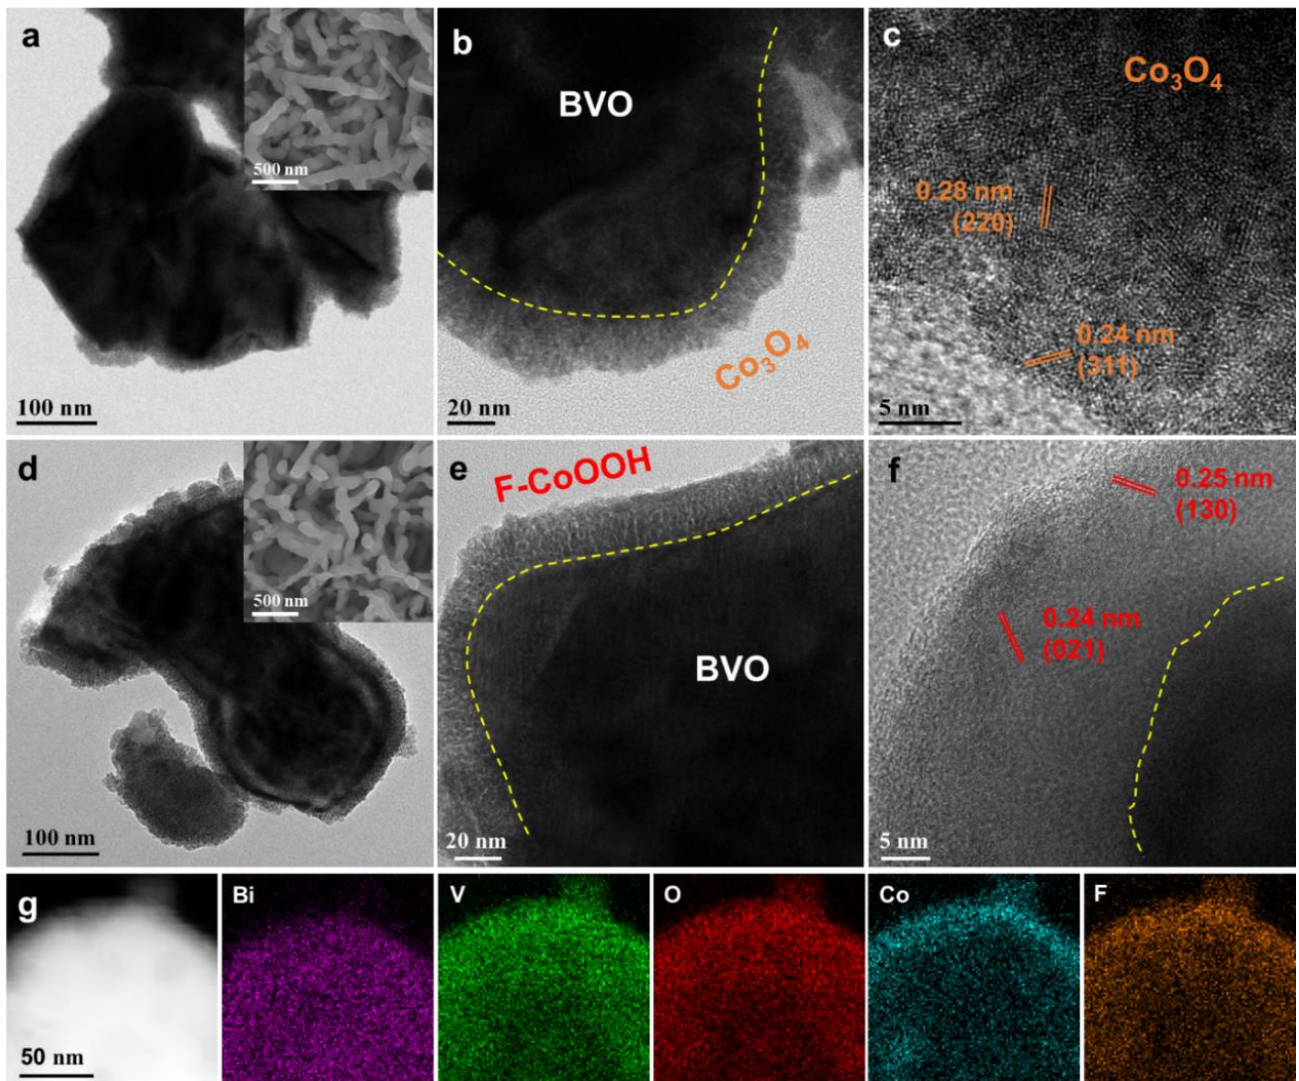

**Figure S10.** (a-c) TEM images of as-prepared  $\text{Co}_3\text{O}_4/\text{BVO}$ ; (d-f) TEM images of activated  $\text{Co}_3\text{O}_4/\text{BVO}$  after  $J-t$  measurement in  $\text{KBi}+\text{F}$ ; (g) TEM-EDS mapping of activated  $\text{Co}_3\text{O}_4/\text{BVO}$  after  $J-t$  measurement. The activated  $\text{Co}_3\text{O}_4/\text{BVO}$  was performed under  $J-V$  test for scanning in  $\text{KBi}+\text{F}$ .



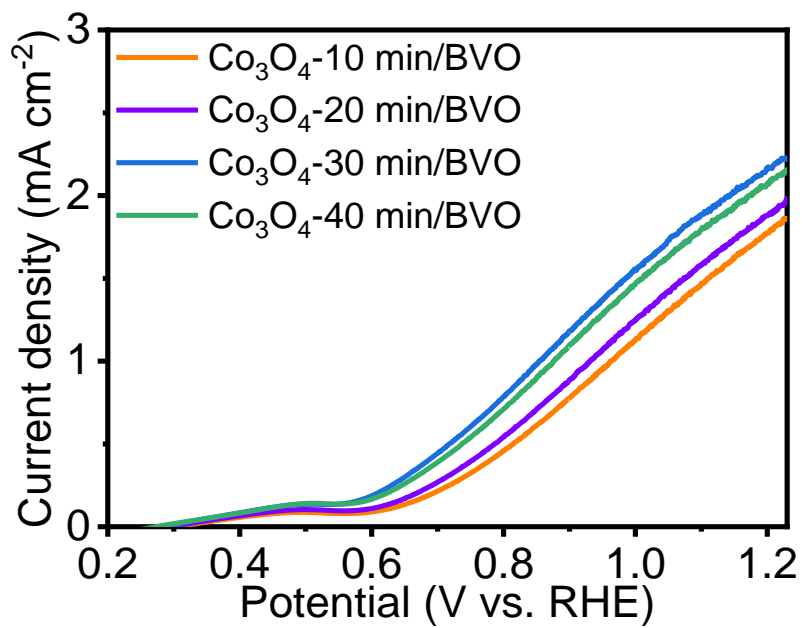

**Figure S11.** *J-V* curves of Co<sub>3</sub>O<sub>4</sub>/BVO electrodes with various hydrothermal times in KBi under AM 1.5G illumination.



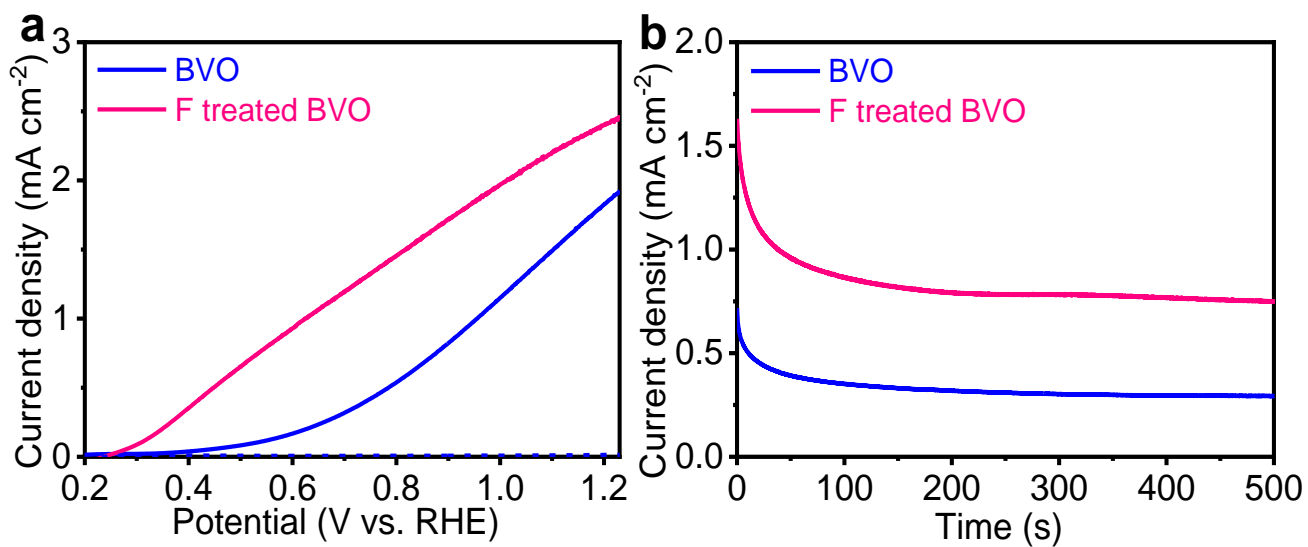

**Figure S12.** (a)  $J$ - $V$  curves of BVO and F treated BVO in KBi under AM 1.5G illumination; (b)  $J$ - $t$  curves of BVO and F treated BVO in KBi at 0.8 V<sub>RHE</sub> under AM 1.5G illumination. The BVO was treated in 1 M NH<sub>4</sub>F for 3 h (noted as F treated BVO).

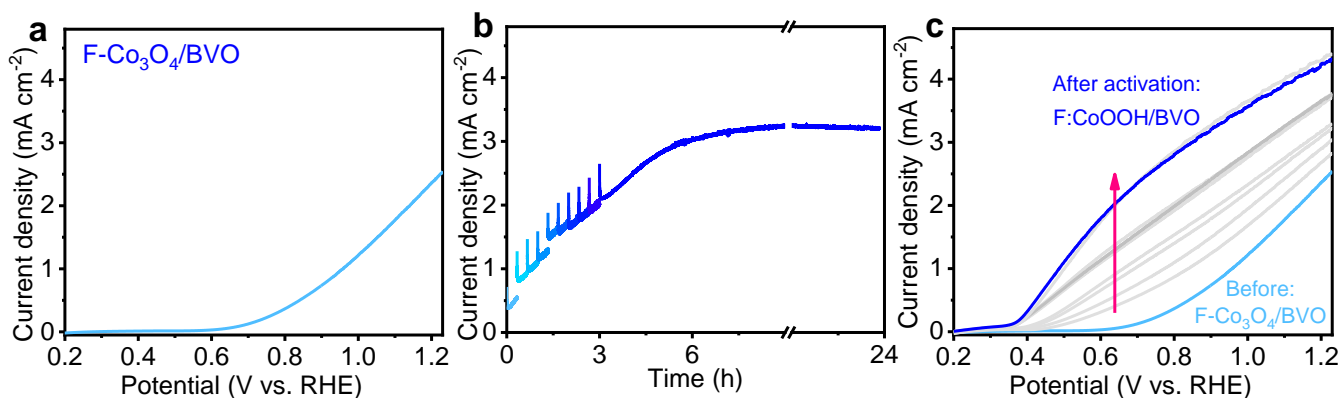

**Figure S13.** (a)  $J$ - $V$  curve of F-Co<sub>3</sub>O<sub>4</sub>/BVO in 1 M KBi; (b)  $J$ - $t$  plots of correspond sample at 0.8 V<sub>RHE</sub> for activation. The content of NH<sub>4</sub>F powder was controlled of 0.05 g; (c)  $J$ - $V$  curves of F-Co<sub>3</sub>O<sub>4</sub>/BVO in KBi with various scanning cycles according to  $J$ - $t$  measurement. All measurements were tested under AM 1.5G illumination.

For comparison, the F doped Co<sub>3</sub>O<sub>4</sub> cocatalyst after thermal treatment was synthesized. The  $J$ - $V$  curve of F-Co<sub>3</sub>O<sub>4</sub>/BVO electrode shows a low photocurrent in KBi (**Figure S13a**). The electrode was then applied a bias at 0.8 V<sub>RHE</sub> at a certain intervals under AM 1.5G illumination. The  $J$ - $t$  curve (**Figure S13b**) exhibits that the photocurrent is initially decreased rapidly, and then rises gradually, accompanying with the improved  $J$ - $V$  curve as illustrated in **Figure S13c**. The photocurrent reaches up to a maximum of 4.1 mA cm<sup>-2</sup> at 1.23 V<sub>RHE</sub>, with a negative shift of onset potential from 0.65 V<sub>RHE</sub> (initial cycle) to 0.38 V<sub>RHE</sub>. Further TEM examination (**Figure S14**) confirms that after the stability measurement, the cocatalyst layer becomes thinner 5~10 nm in thickness in contrast to the as-prepared electrode with a cocatalyst layer of 20~30 nm. This is consistent with the result of F:Co(CO<sub>3</sub>)<sub>x</sub>OH<sub>y</sub>/BVO after  $J$ - $t$  test, which is due to the transformation from F-Co<sub>3</sub>O<sub>4</sub> to F:CoOOH during  $J$ - $t$  measurement. The dissolution of cocatalyst is confirmed by XPS data (**Figure S15**), in which Co is reduced from 7.7 at.% to 6.48 at.%, accompanying with the loss of F from 4.76 at.% to 2.8 at.%.

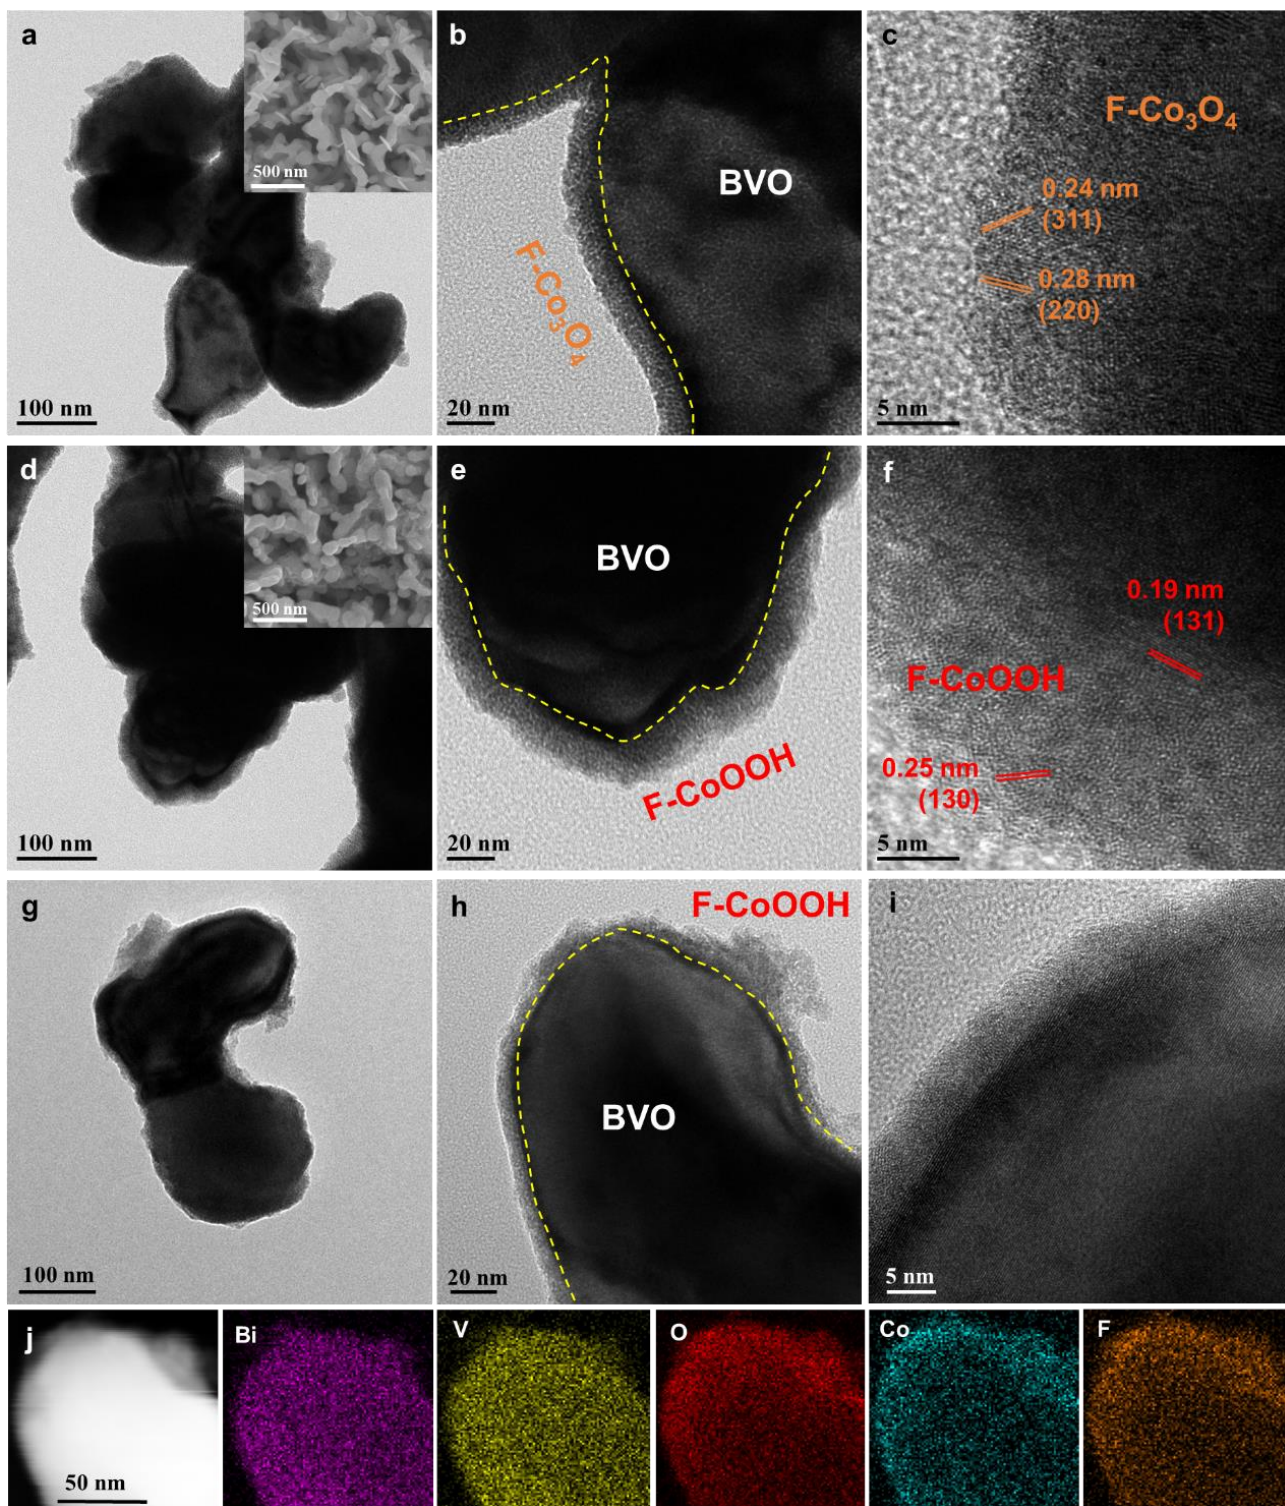

**Figure S14.** (a-c) TEM images of as-prepared F-Co<sub>3</sub>O<sub>4</sub>/BVO; (d-f) TEM images of activated F-Co<sub>3</sub>O<sub>4</sub>/BVO in KBi; (g-i) TEM images of activated F-Co<sub>3</sub>O<sub>4</sub>/BVO after *J-t* measurement; (j) TEM-EDS mapping of activated F-Co<sub>3</sub>O<sub>4</sub>/BVO after *J-t* measurement. The activated F-Co<sub>3</sub>O<sub>4</sub>/BVO was performed in KBi under *J-t* test with various scans.

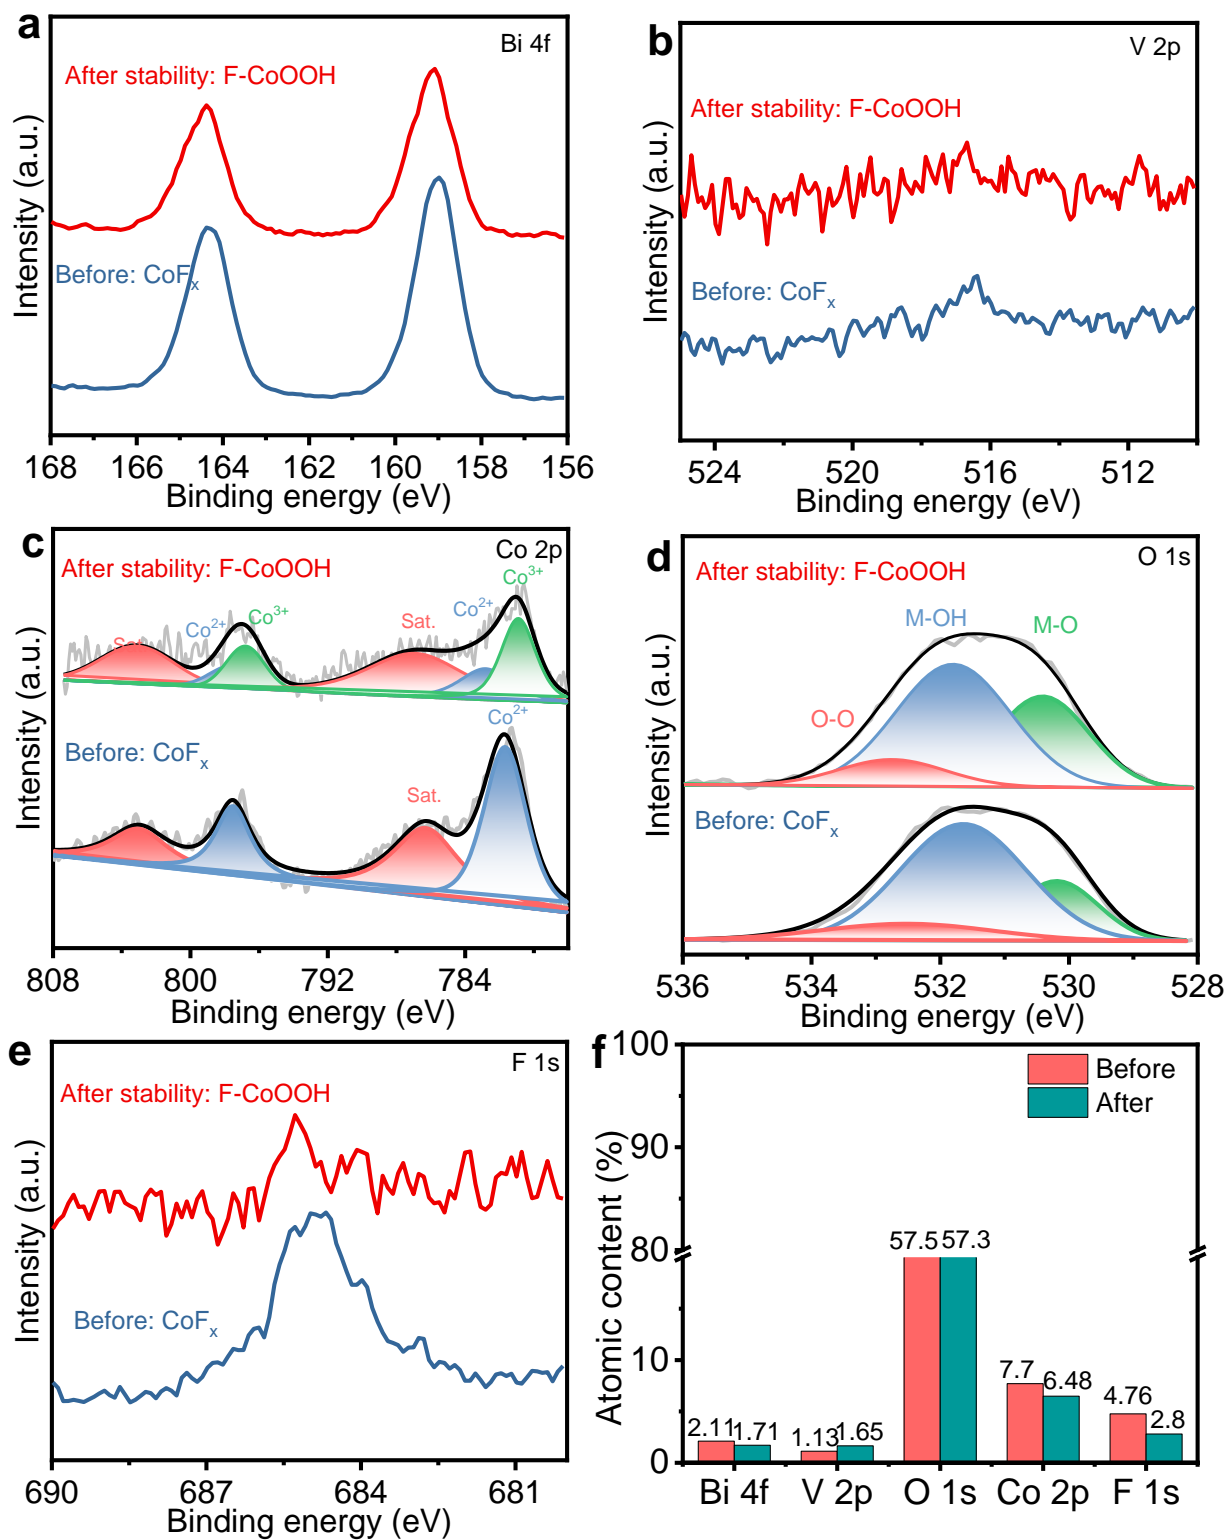

**Figure S15.** (a) Bi 4f, (b) V 2p, (c) Co 2p, (d) O 1s, (e) F 1s XPS spectra of F-Co<sub>3</sub>O<sub>4</sub>/BVO before and after activation; (f) atomic ratio of corresponding samples.

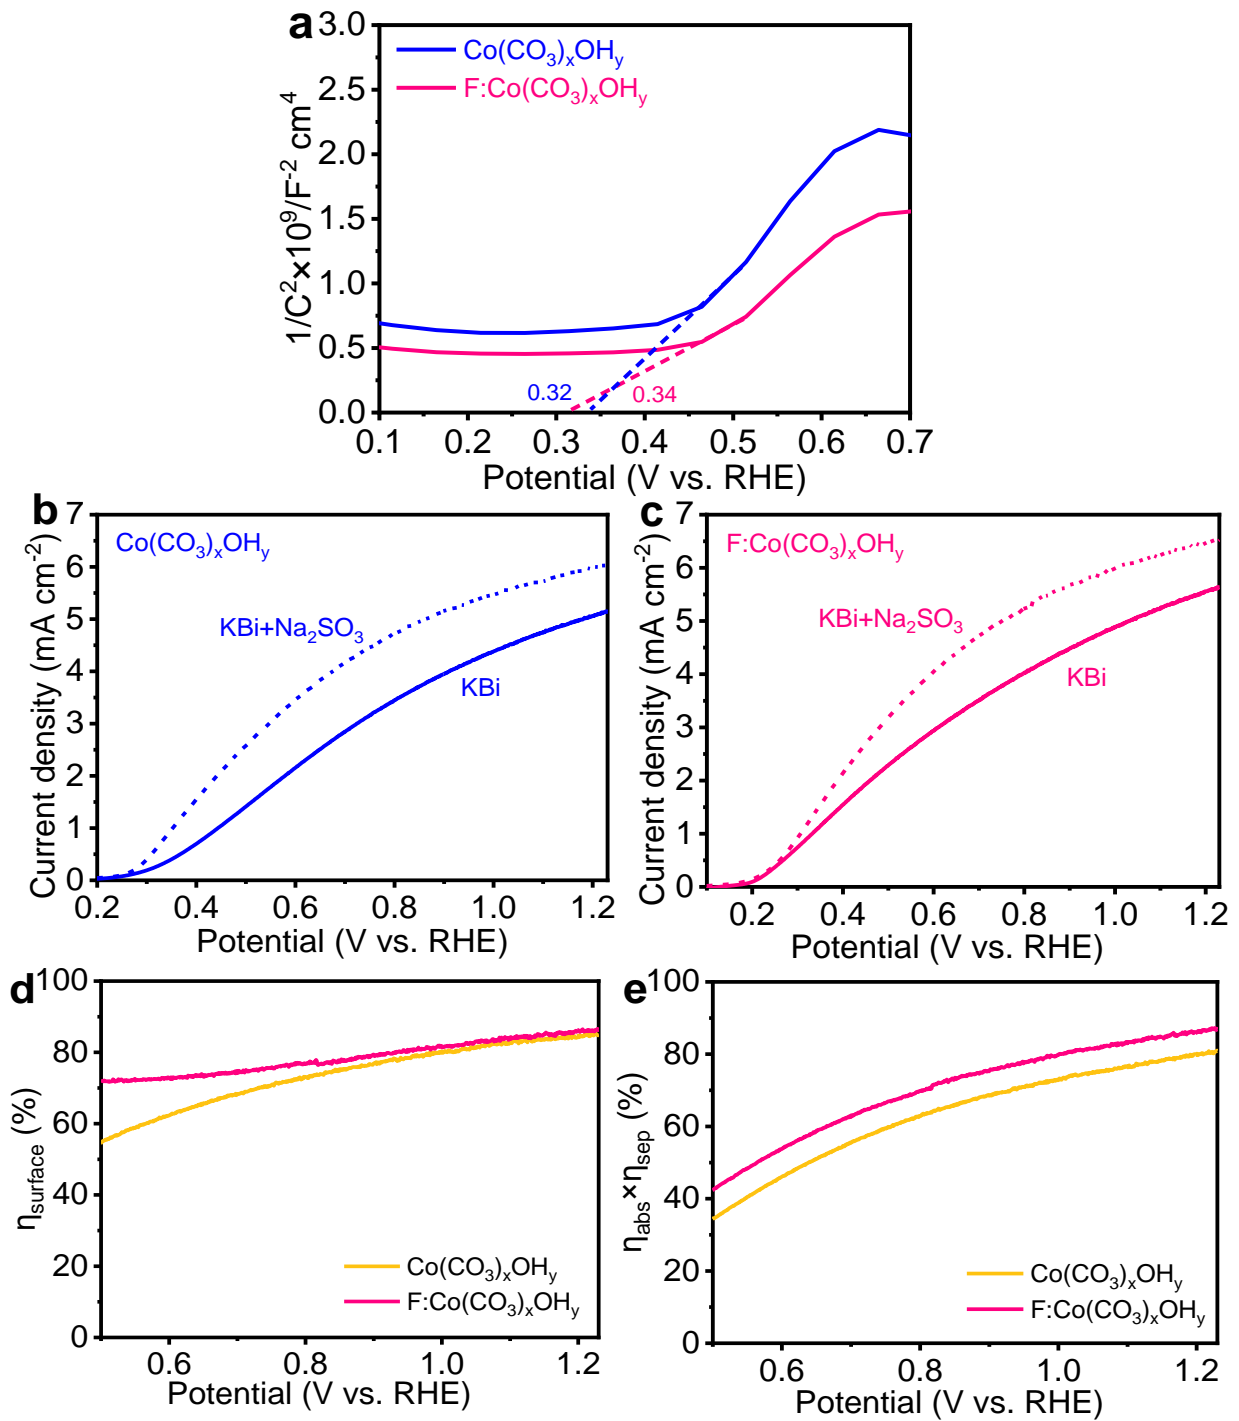

**Figure S16.** (a) Mott-Schottky measurements of  $\text{Co}(\text{CO}_3)_x\text{OH}_y/\text{BVO}$  and  $\text{F:Co}(\text{CO}_3)_x\text{OH}_y/\text{BVO}$  in KBi; (b)  $J$ - $V$  curves of  $\text{Co}(\text{CO}_3)_x\text{OH}_y/\text{BVO}$  in KBi without and with  $\text{Na}_2\text{SO}_3$ ; (c)  $J$ - $V$  curves of  $\text{F:Co}(\text{CO}_3)_x\text{OH}_y/\text{BVO}$  in KBi without and with  $\text{Na}_2\text{SO}_3$ ; (d) surface separation efficiency and (e) production of light absorption and charge separation of  $\text{Co}(\text{CO}_3)_x\text{OH}_y/\text{BVO}$  and  $\text{F:Co}(\text{CO}_3)_x\text{OH}_y/\text{BVO}$ .

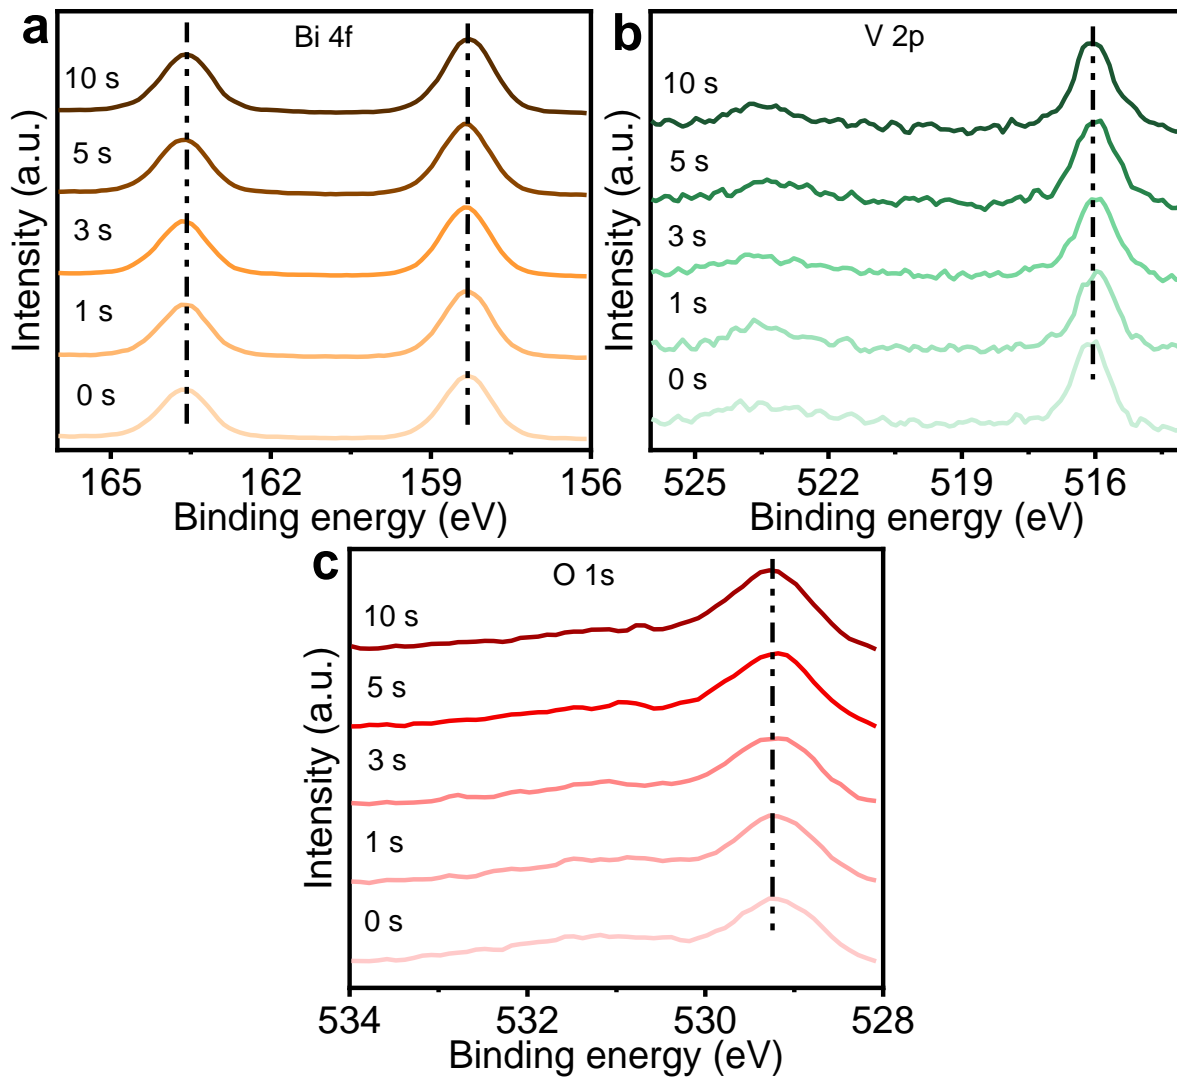

**Figure S17.** (a-c) XPS depth profiles of (a) Bi 4f, (b) V 2p, and (c) O 1s spectra of  $\text{Co}(\text{CO}_3)_x\text{OH}_y/\text{BVO}$  in  $\text{KBi}+\text{F}$  under  $J-t$  measurement at  $0.6 \text{ V}_{\text{RHE}}$  for 2 h under AM 1.5G illumination.



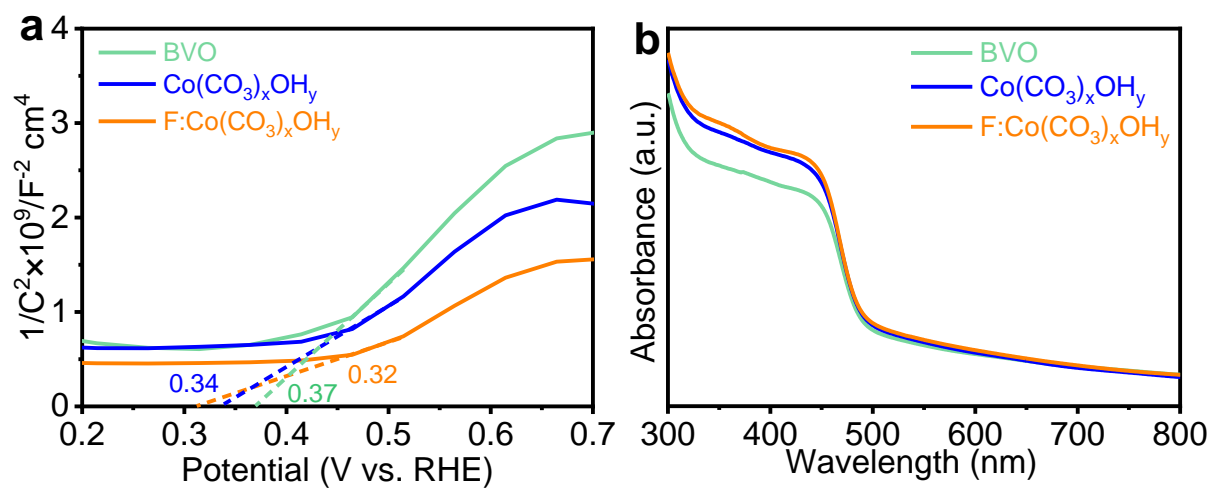

**Figure S18.** (a) Mott-Schottly plots and (b) UV-vis spectra of BVO,  $\text{Co}(\text{CO}_3)_x\text{OH}_y/\text{BVO}$ , and  $\text{F}:\text{Co}(\text{CO}_3)_x\text{OH}_y/\text{BVO}$ .

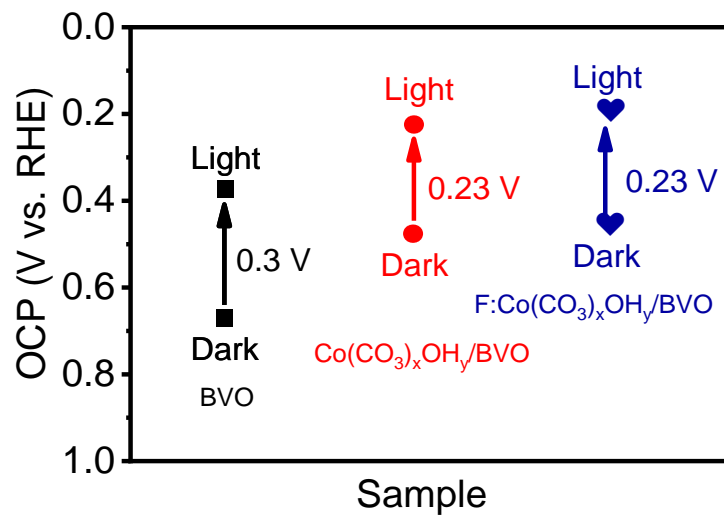

**Figure S19.** Open circuit potentials of BVO, Co(CO<sub>3</sub>)<sub>x</sub>OH<sub>y</sub>/BVO, and F:Co(CO<sub>3</sub>)<sub>x</sub>OH<sub>y</sub>/BVO electrodes.



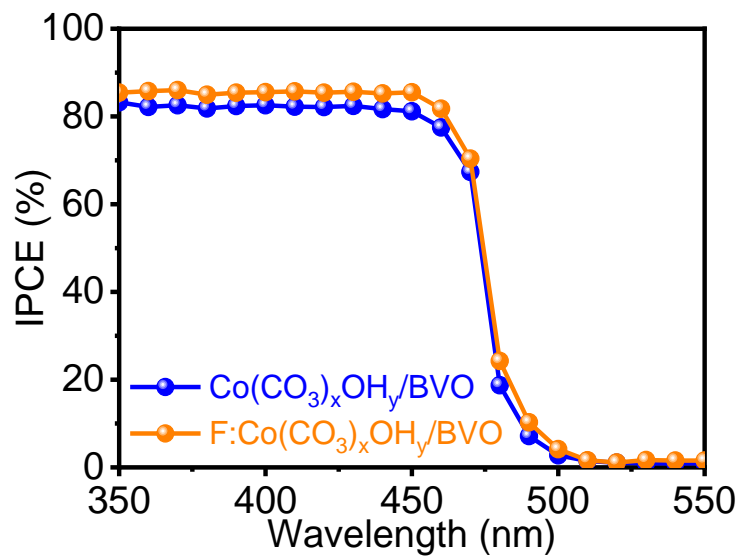

**Figure S20.** IPCE values of  $\text{Co}(\text{CO}_3)_x\text{OH}_y/\text{BVO}$  and  $\text{F}:\text{Co}(\text{CO}_3)_x\text{OH}_y/\text{BVO}$  electrodes.

**Table S2.** Comparison of IPCE values and charge efficiency for BiVO<sub>4</sub>-based photoelectrodes.

| Photoanode                                                           | Electrolyte                                                | $\eta_{\text{trans}}$<br>@1.23 V <sub>RHE</sub> | IPCE<br>@1.23 V <sub>RHE</sub> | Reference                                             |
|----------------------------------------------------------------------|------------------------------------------------------------|-------------------------------------------------|--------------------------------|-------------------------------------------------------|
| Co(CO <sub>3</sub> ) <sub>x</sub> OH <sub>y</sub> /BiVO <sub>4</sub> | 1 M KBi (pH=9.5)                                           | 89%                                             | 85%@430 nm                     | <i>J. Mater. Chem. A</i> 2020, 8, 2563.               |
| Co-Pi/BiVO <sub>4</sub>                                              | 0.5 M KPi (pH=7)                                           | 71%                                             | 70%@450 nm                     | <i>Energy Environ. Sci.</i> 2018, 11, 1299.           |
| Co-Pi/BiVO <sub>4</sub> /ZnO                                         | 0.3 M Na <sub>2</sub> SO <sub>4</sub> +KPi (pH=7.5)        | ---                                             | 40%@400 nm                     | <i>Nano Energy</i> 2017, 32, 232.                     |
| Co-Pi/BiVO <sub>4</sub><br>/Ta:TiO <sub>2</sub>                      | 0.5 M KPi (pH=7)                                           | ---                                             | 50%@450 nm                     | <i>ACS Cent. Sci.</i> 2016, 2, 80.                    |
| Co-Pi/BiVO <sub>4</sub>                                              | 0.1 M KPi (pH=7)                                           | ---                                             | 70%@450 nm                     | <i>ChemSusChem</i> 2012, 5, 1420.                     |
| Co-Pi/BiVO <sub>4</sub> /WO <sub>3</sub>                             | 0.1 M KPi (pH=7)                                           | 75%                                             | 60%@350 nm                     | <i>ACS Appl. Mater. Interfaces</i><br>2018, 11, 5623. |
| Co-Ci/H,Mo:BiVO <sub>4</sub>                                         | 0.1 M KPi (pH 7.0)                                         | 95%                                             | 80%@450 nm                     | <i>ACS Nano</i> 2015, 9, 11820.                       |
| U-CoOOH/BiVO <sub>4</sub>                                            | 0.2 M Na <sub>2</sub> SO <sub>4</sub> (pH=7)               | 89%                                             | 76%@420 nm                     | <i>J. Mater. Chem. A</i> 2019, 7, 4415.               |
| Co <sub>4</sub> O <sub>4</sub> /BiVO <sub>4</sub>                    | 0.5 M KBi (pH=9.3)                                         | 90%                                             | 93%@420 nm                     | <i>Angew. Chem. Int. Ed.</i> 2017, 56,<br>6911.       |
| CoOx/BiVO <sub>4</sub><br>/WO <sub>3</sub> /SnO <sub>2</sub>         | 0.5 M KPi (pH=7)                                           | 85%                                             | 55%@450 nm                     | <i>ACS Appl. Mater. Interfaces</i><br>2017, 9, 1479.  |
| <b>Co(CO<sub>3</sub>)<sub>x</sub>OH<sub>y</sub>/BiVO<sub>4</sub></b> | <b>1 M KBi without and with F<sup>-</sup><br/>(pH=9.5)</b> | <b>85%</b>                                      | <b>83%@450 nm</b>              | <b><i>This work.</i></b>                              |
